# Supplementary material for: 3D bioprinting of nanoparticle-laden hydrogel scaffolds with enhanced antibacterial and imaging properties
Source: PubMed Central journal article supplement — iScience. 2022 Aug 15;25(9):104947. doi: 10.1016/j.isci.2022.104947 (PMC9440295; doi:10.1016/j.isci.2022.104947), 2022-08-15
Supplement: mmc1.pdf [file mmc1.pdf]

iScience, Volume 25

## **Supplemental information**

### **3D bioprinting of nanoparticle-laden hydrogel scaffolds with enhanced antibacterial and imaging properties**

**Andrea S. Theus, Liqun Ning, Gabriella Kabboul, Boeun Hwang, Martin L. Tomov, Christopher N. LaRock, Holly Bauser-Heaton, Morteza Mahmoudi, and Vahid Serpooshan**

## Figures

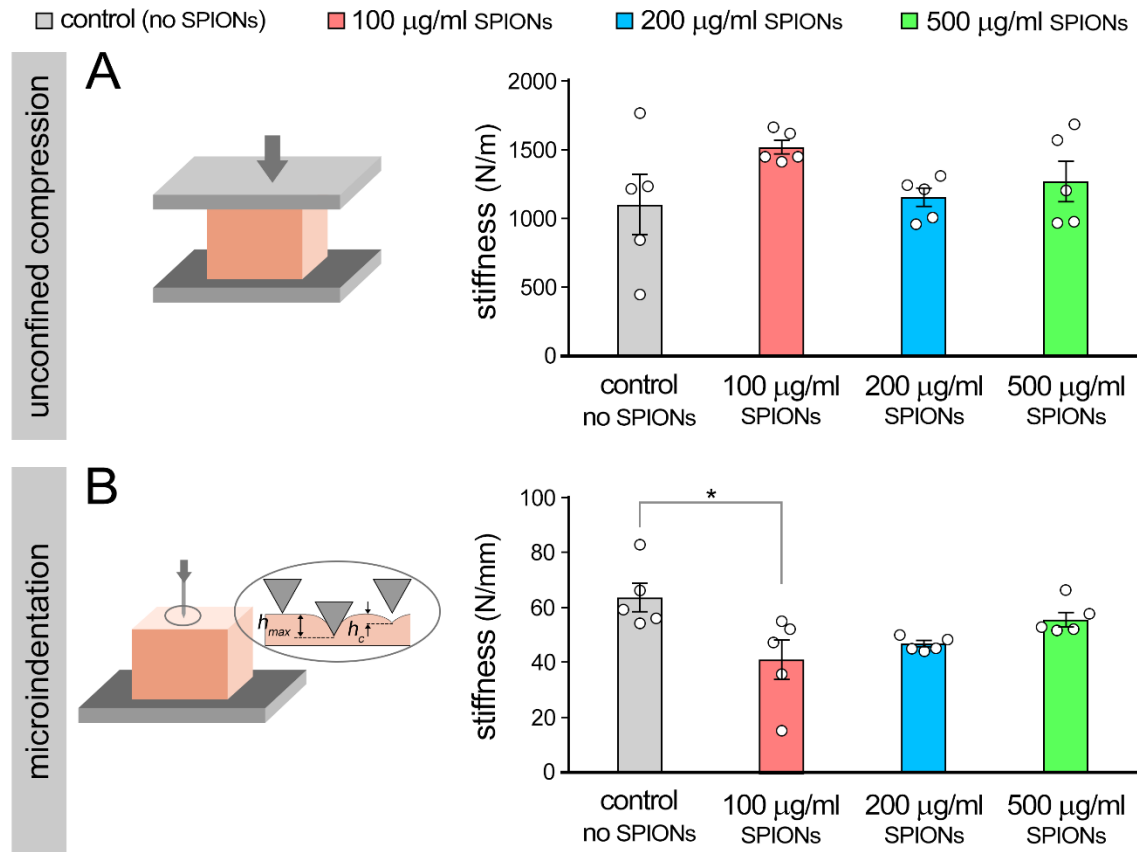

**Figure S1. Mechanical testing of bioprinted scaffolds loaded with varying concentrations of superparamagnetic iron oxide nanoparticles (SPIONs).** **A:** Unconfined compression test conducted (at a 50% total strain at 20  $\mu\text{m/s}$ ) on bioprinted GelMA scaffolds containing no SPIONs (control), 100, 200, and 500  $\mu\text{g/mL}$  SPIONs ( $n = 4$  per group). Stiffness values were calculated from the slope of the force-displacement curves at the initial 0-20% interval. **B:** Microindentation tests were conducted on GelMA constructs using a 500  $\mu\text{m}$  probe, with a depth of 100  $\mu\text{m}$  at 2  $\mu\text{m/s}$  ( $n = 5$  per group). Stiffness values were calculated based on the force-displacement unloading curves as described in Methods. \* p-value < 0.05, \*\* p-value < 0.01.

## Tables

**Table S1.** List of structural fidelity measurements conducted for the 3D bioprinted SPION-laden scaffold groups in this study. Raw values (average  $\pm$  standard deviation) of each parameter is presented.

|                                               | $D_r$ (mm)      | $UC_r$ (mm)     | $\alpha_r$ ( $^\circ$ ) | $A_r$ (mm <sup>2</sup> ) |
|-----------------------------------------------|-----------------|-----------------|-------------------------|--------------------------|
| <b>CAD model</b>                              | 0.30            | 9.00            | 60.00                   | 1.00                     |
| <b>0 <math>\mu\text{g/mL}</math> SPIONs</b>   | 1.19 $\pm$ 0.15 | 0.98 $\pm$ 0.02 | 0.95 $\pm$ 0.07         | 1.64 $\pm$ 0.10          |
| <b>100 <math>\mu\text{g/mL}</math> SPIONs</b> | 1.13 $\pm$ 0.19 | 0.99 $\pm$ 0.01 | 1.01 $\pm$ 0.06         | 1.62 $\pm$ 0.10          |
| <b>200 <math>\mu\text{g/mL}</math> SPIONs</b> | 1.83 $\pm$ 0.23 | 0.98 $\pm$ 0.03 | 0.98 $\pm$ 0.06         | 1.59 $\pm$ 0.09          |
| <b>500 <math>\mu\text{g/mL}</math> SPIONs</b> | 1.60 $\pm$ 0.21 | 0.97 $\pm$ 0.02 | 0.97 $\pm$ 0.10         | 1.64 $\pm$ 0.10          |

*The parameters are defined as strand diameter ( $D_r$ ), strand uniformity ( $U_r$ ), strand angle ( $\alpha_r$ ), and inter-strand area ( $A_r$ ) ratios, obtained using equations (5) to (8).*

**Table S2.** Average Young's moduli (N/m) of 3D bioprinted SPION-laden scaffolds obtained using microindentation tests (slope of the curve at 90-100% displacement). Raw modulus values of scaffolds with varying concentrations of SPIONs in the ink are listed ( $n = 5$  per study group).

|                              | <b>0 <math>\mu\text{g/mL}</math> SPIONs</b> | <b>100 <math>\mu\text{g/mL}</math> SPIONs</b> | <b>200 <math>\mu\text{g/mL}</math> SPIONs</b> | <b>500 <math>\mu\text{g/mL}</math> SPIONs</b> |
|------------------------------|---------------------------------------------|-----------------------------------------------|-----------------------------------------------|-----------------------------------------------|
| Sample 1                     | 123.94                                      | 75.59                                         | 111.86                                        | 118.31                                        |
| Sample 2                     | 184.43                                      | 116.35                                        | 103.57                                        | 129.57                                        |
| Sample 3                     | 148.51                                      | 84.15                                         | 114.98                                        | 119.90                                        |
| Sample 4                     | 134.33                                      | 121.80                                        | 105.03                                        | 147.02                                        |
| Sample 5                     | 127.91                                      | 106.34                                        | 104.98                                        | 117.46                                        |
| <b>Average modulus (N/m)</b> | <b>143.82</b>                               | <b>100.84</b>                                 | <b>108.08</b>                                 | <b>126.45</b>                                 |
| <b>Std Dev</b>               | <b>24.54</b>                                | <b>20.16</b>                                  | <b>5.03</b>                                   | <b>12.48</b>                                  |
